# Supplementary material
Source: PubMed Central journal article supplement (PMC8054714)
Supplement: sj-pdf-1-jcb-10.1177_0271678X20942613.pdf [file sj-pdf-1-jcb-10.1177_0271678X20942613.pdf]

**Supplemental figure 1: Body weight and survival rate after ICH**

| Group         |           | Weight     | No. of animals | Survival rate(%) |
|---------------|-----------|------------|----------------|------------------|
| Sham          | WT        | 21.15±0.84 | 24             | 91.7             |
|               | HDAC2 cKO | 21.19±0.62 | 25             | 92.2             |
| ICH           | WT        | 20.76±0.79 | 32             | 75.0             |
|               | HDAC2 cKO | 21.04±0.75 | 30             | 80.0             |
| Sham          |           | 21.11±0.60 | 42             | 90.1             |
| ICH+Scriptaid |           | 20.99±0.74 | 60             | 82.0             |
| ICH+Veh       |           | 20.80±0.79 | 64             | 78.0             |
