# Supplementary material
Source: PubMed Central journal article supplement (PMC8054714)
Supplement: sj-pdf-2-jcb-10.1177_0271678X20942613.pdf [file sj-pdf-2-jcb-10.1177_0271678X20942613.pdf]

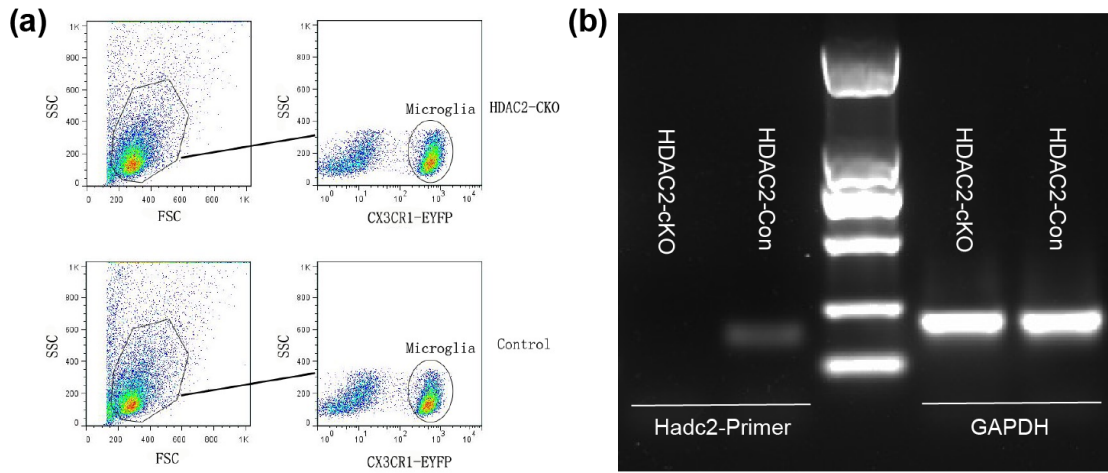

**Supplementary figure 1:** HDAC2 was efficiently depleted in the microglia. Gating strategy to isolate microglia for confirming *Hdac2* knockdown (a). The result of agarose gel electrophoresis demonstrated *Hdac2* was efficiently knockdown in HDAC2 cKO mice (b).

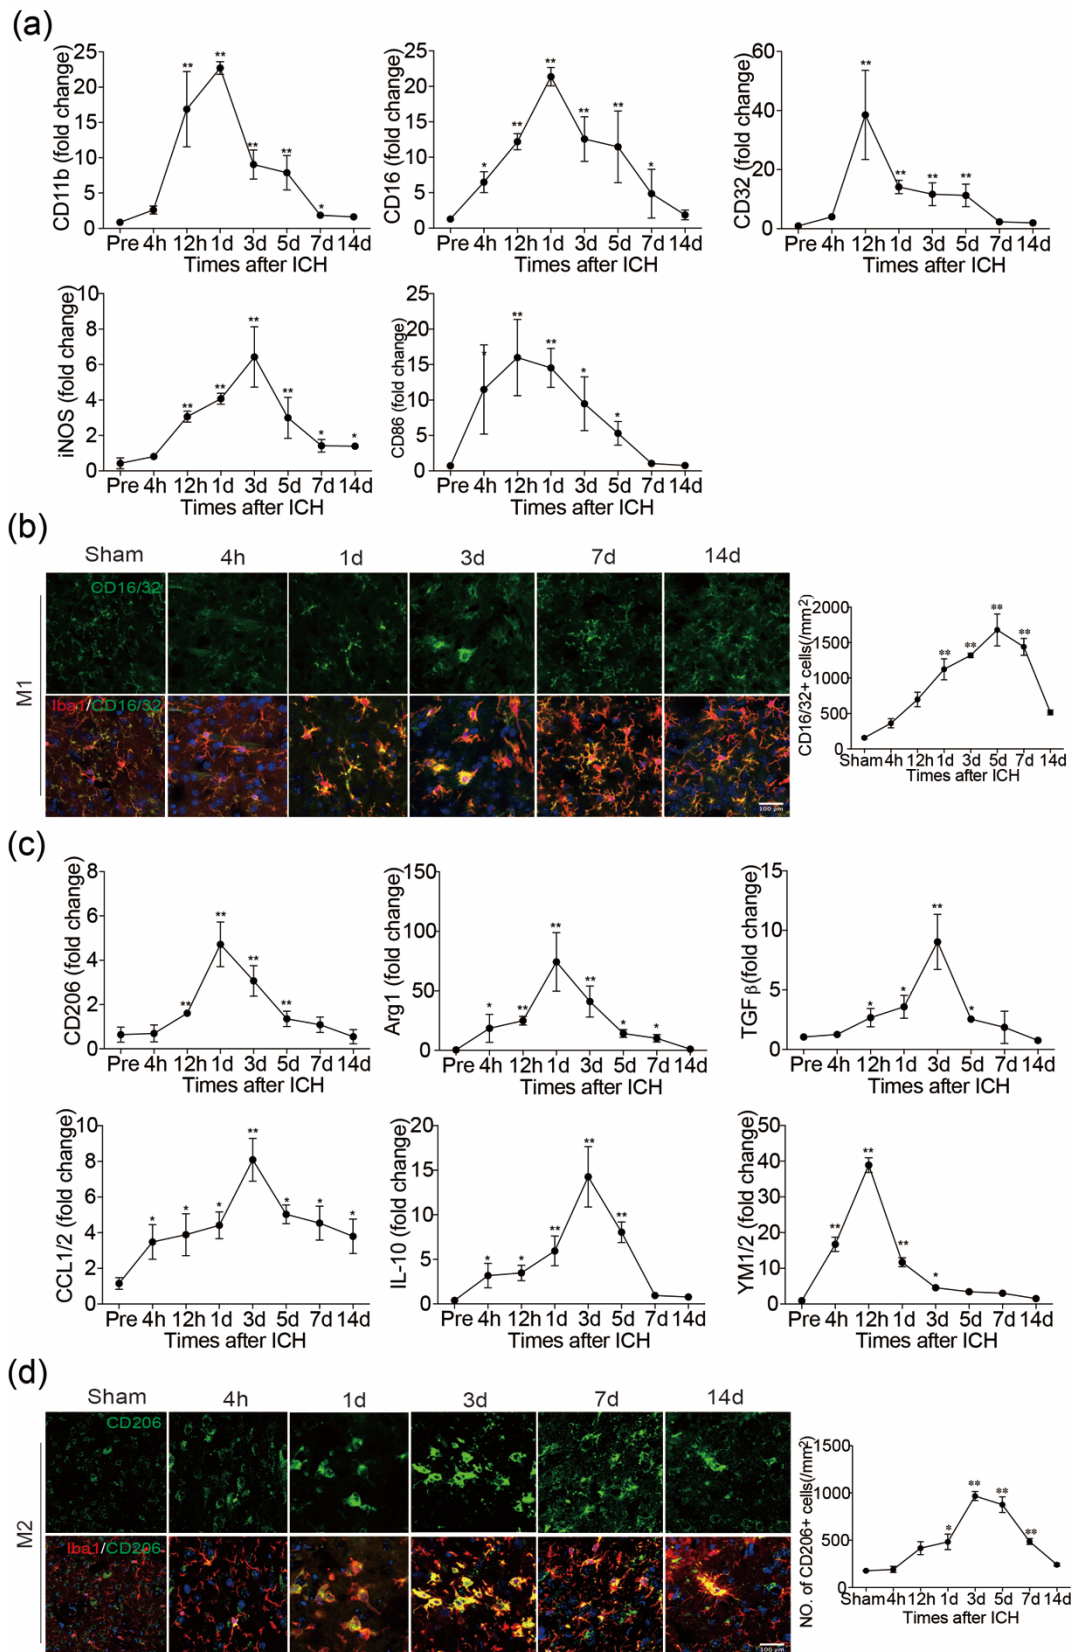

**Supplementary figure 2: Temporal changes in microglia/macrophage polarization toward the M1 and M2 phenotypes after intracerebral hemorrhage (ICH). (a, c)**

Reverse-transcription polymerase chain reaction (RT-PCR) show messenger RNA expression of M1 and M2 markers at 4 and 12 hours and 1, 3, 5, 7, and 14 days after ICH. (b, d) Representative immunostaining images of Iba1 (red), CD16/32 (green), and CD206 (green) at 4 and 12 hours and 1, 3, 5, 7, and 14 days after ICH in the ipsilateral basal ganglia (scale bar=100  $\mu$ m). n=3-4/group. \*  $P \leq 0.05$ , \*\* $P \leq 0.01$  vs sham.

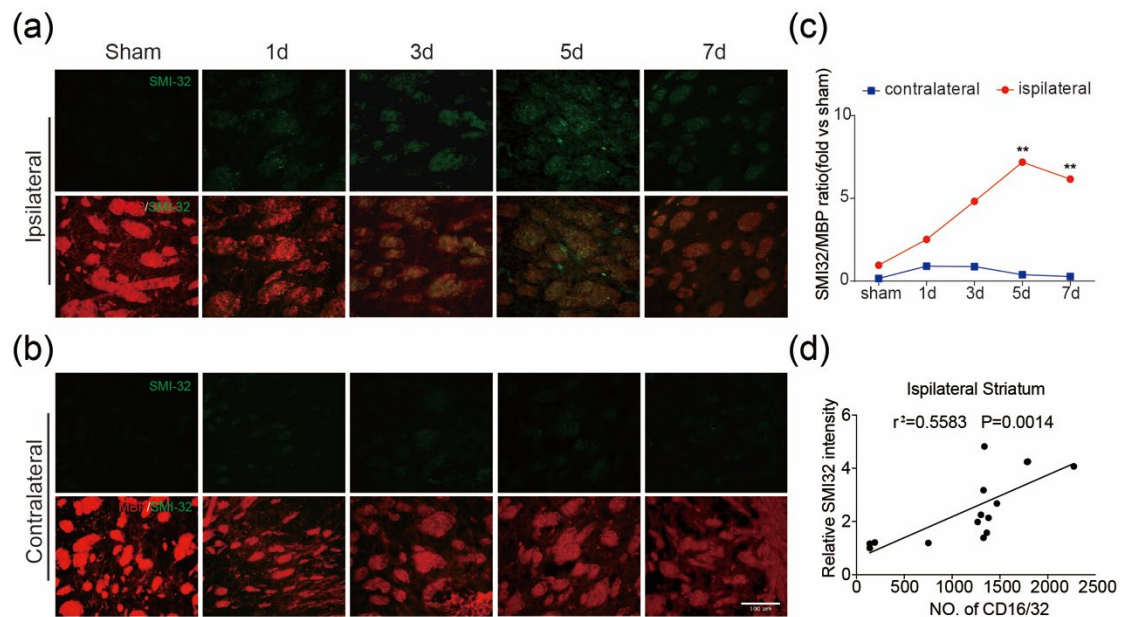

**Supplementary figure 3:** Representative immunostaining images of myelin basic protein (MBP, red) and SMI-32 (green) in the ipsilateral (a) and contralateral (b) striatum (Scale bar=100  $\mu$ m). (c) Time course of bilateral SMI-32/MBP ratio 1, 3, 5 and 7 days after ICH in basal ganglia. (d) The numbers of CD16/32+ cells were positively correlated to SMI-32 intensity in the ipsilateral striatum ( $r^2 = 0.5529$ ,  $P = 0.0015$ ). # $P \leq 0.01$  vs the sham group. n=3 to 4/group. \*\* $P \leq 0.01$  vs contralateral.

(a)

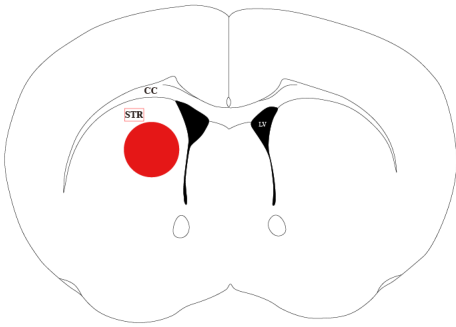

(b)

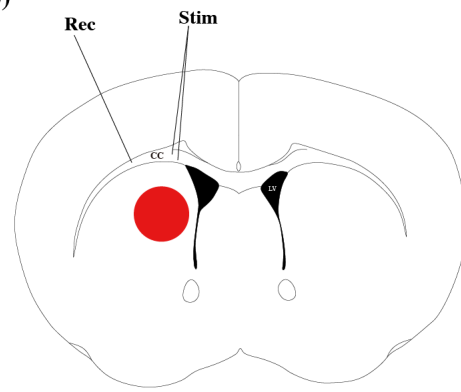

**Supplementary figure 4:** Illustration of the regions for immunohistochemistry, RT-PCR and electron microscopy (red box) (a). Stimulating and recording electrodes were positioned at the CC as shown to measure the evoked CAPs (b).
